# Supplementary material
Source: HighWire-hosted journal article supplement (https://jcptest-stage.highwire.org/content/69/12/1116)
Supplement: inline-supplementary-material-5 [file inline-supplementary-material-5.pdf]

## SUPPLEMENTARY FILE 5

### Biological positive control used in each run of RNA ISH

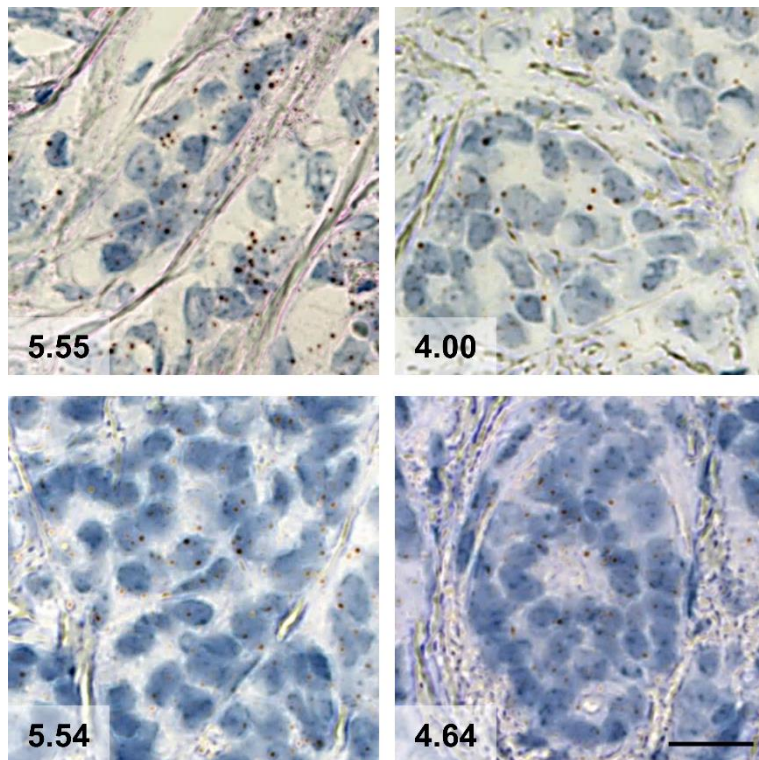

**Figure S4: Reproducibility of RNA *in situ* hybridization.**

Consecutive sections of the same patient sample (sample #6) were hybridized in different runs using the *POLR2A* probe (positive control). Numbers in boxes indicate the average number of spots per cell as determined with the SpotStudio software, and indicate that results were comparable between runs. Scale bar: 20 μm; all images shown at identical magnifications.
